# Supplementary material for: Survival and Prognostic Factors of Ultra-Central Tumors Treated with Stereotactic Body Radiotherapy
Source: MDPI journal article supplement (doi:10.3390/cancers14235908), 2022-11-29

**Supplementary Materials Table S1.** Prognostic factor at multivariate analysis.

| Covariate              | HR (95% CI)   | p value |
|------------------------|---------------|---------|
| Gender                 | 0.6 (0.4-1.0) | 0.054   |
| Male (71)              |               |         |
| Female (51)            |               |         |
| Age                    | 1.9 (1.2-3.0) | 0.006   |
| <70 years (51)         |               |         |
| ≥70 years (71)         |               |         |
| Tumor-trachea distance | 2.2 (1.2-4.2) | 0.015   |
| ≤ 5mm (21)             |               |         |
| > 5 mm (101)           |               |         |

**Supplementary Materials Figure S1.** Progression free survival of patients with tumor size < or ≥ 5 cm (a) and patients with primary lung cancer and tumor size < 5 cm (b).

**a.**

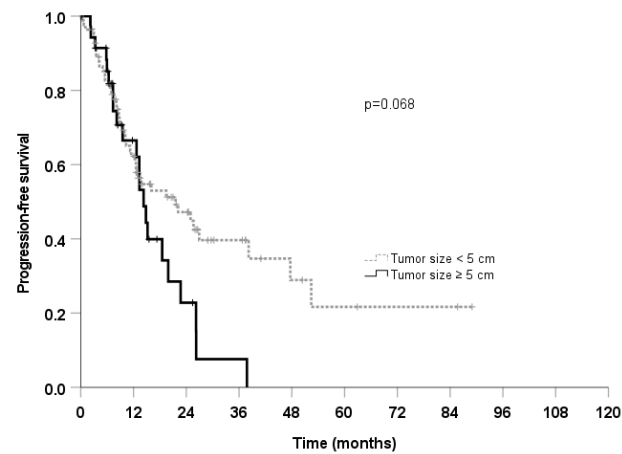

**b.**

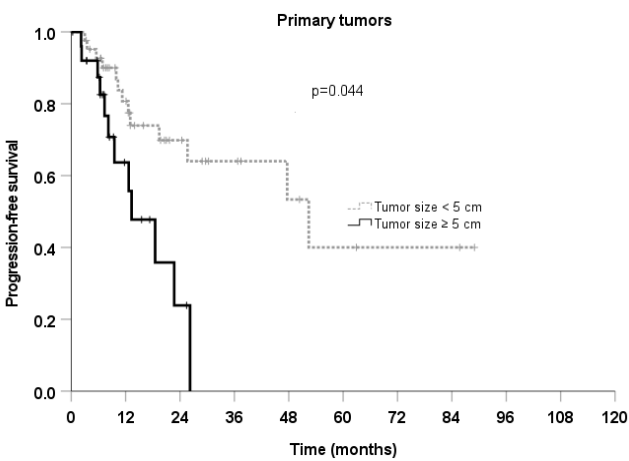

Supplement: s1 [file s1]
